# Supplementary material for: Environmentally stable Mn-doped CsPbX3@CsPb2X5 core–shell materials with efficient energy transfer
Source: Royal Society of Chemistry journal article supplement (doi:10.1039/d4tc01135j), 2024-01-01
Supplement: d4tc01135j1.pdf [file d4tc01135j1.pdf]

## Supporting information

### Efficient Energy Transfer and Environmentally Stable Mn-doped CsPbX<sub>3</sub>@CsPb<sub>2</sub>X<sub>5</sub> Core-shell Materials

Chen Zhang<sup>1</sup>, Luxia Xu<sup>2</sup>, Minqiang Wang\*<sup>1</sup>, Zheyuan Da<sup>1</sup>, Jindou Shi<sup>1</sup>, Junnan Wang<sup>1</sup>, Qing Yao<sup>1</sup>, Jinshou Tian<sup>2</sup>, Nikolai V. Gaponenko<sup>3</sup>, and Youlong Xu<sup>1</sup>

<sup>1</sup>Electronic Materials Research Laboratory, Key Laboratory of the Ministry of Education International Center for Dielectric Research&Shannxi Engineering Research Center of Advanced Energy Materials and Devices, Xi'an Jiaotong University, 710049 Xi'an, China.

<sup>2</sup>Xi'an Institute of Optics and Precision Mechanics, CAS, Add: NO.17 Xixi Road, New Industrial Park, Xi'an Hi-Tech Industrial Development Zone, 710119 Xi'an, Shaanxi, China.

<sup>3</sup>Belarusian State University of Informatics and Radioelectronics, P. Browki 6, 220013 Minsk, Belarus.

Corresponding Author: E-mail: mqwang@xjtu.edu.cn

## Experimental Section

### 1.1. Materials

The cesium carbonate ( $\text{Cs}_2\text{CO}_3$ , 99.99%), manganese(II) chloride ( $\text{MnCl}_2$ , 99.99%), lead(II) bromide ( $\text{PbBr}_2$ , 99.99%), lead(II) iodide ( $\text{PbI}_2$ , 99.99%), oleic acid (OA, 85%), oleylamine (OAm, 80~90%), 1-octadecene (ODE, 90%), and toluene (>99.7%) were purchased from Aladdin. Poly(styrene) (PS) were purchased from Macklin. 365 nm blue light chips (5 W) were purchased from CREE company. All the reagents were used without further purification.

### 1.2 Synthesis of Mn-doped $\text{CsPb}(\text{Cl}/\text{Br})_3@ \text{CsPb}_2(\text{Cl}/\text{Br})_5$ core-shell materials (MCC).

2.5 mmol  $\text{Cs}_2\text{CO}_3$  was placed in solution consisting of 2.5 mL OA and 10 mL ODE and transferred to 100 mL three-neck flask. The solution was heated to 120 °C under vacuum and reacted for 1 h. After that, the Cs-OA precursor was obtained by heating to 140 °C and reacting for 1 h under  $\text{N}_2$  environment. Note that the Cs-OA precursor needs to be held at 100 °C before use.

0.3 mmol  $\text{MnCl}_2/\text{PbBr}_2$  (e.g. Mn/Pb=1.0, 0.15 mmol  $\text{MnCl}_2$  and 0.15 mmol  $\text{PbBr}_2$ ) was placed in solution consisting of 10 mL ODE, 0.5 mL OA and 0.5 mL OAm and transferred to another 100 mL three-neck flask. The temperature was increased to 120 °C under  $\text{N}_2$  and held for 1 h. After that, the temperature was again increased to 170 °C for 10 min and 0.375 mL Cs-OA was injected into the solution. After 1h of reaction, the three-neck flask was immersed in ice water to terminate the reaction. The precipitates were obtained by centrifugation of the crude solution at 1000 rpm/min for 5 min and washed 2~3 times with toluene. Finally, the precipitation was dispersed into 15 mL toluene to obtain Mn-doped  $\text{CsPb}(\text{Cl}/\text{Br})_3@ \text{CsPb}_2(\text{Cl}/\text{Br})_5$  colloids.

### 1.3 Preparation of white light-emitting diodes (M-WLED).

15 mL Mn-doped  $\text{CsPb}(\text{Cl}/\text{Br})_3@ \text{CsPb}_2(\text{Cl}/\text{Br})_5$  colloids (Mn/Pb=2.0) and 0.5 g PS particles

were stirred at 60 °C for 3 h. Then, the solution was poured into the prefabricated molds and the polymer films were deposited at room temperature. Finally, the two films, MCC and CsPbBr<sub>3</sub>@CsPb<sub>2</sub>Br<sub>5</sub>, were covered on a 365 nm UV chip to obtain P-WLEDs.

#### *Characterization Methods*

The microstructure and EDS spectra of samples were analyzed by HRTEM (JEOL JEM-F200) with energy dispersive spectrometer (EDS). The morphology of the samples were investigated by field emission scanning electron microscopy (FESEM, FEI Quatan FEG 250). Photoluminescence (PL) spectra and time-resolved PL (TRPL) decay curves of samples were recorded on Edinburgh Instruments FLS1000 spectrometer. The ultraviolet-visible (UV-Vis) absorption spectra were recorded with Jasco V-570 UV/VIS/NIR spectrophotometer. X-ray diffraction (XRD) patterns of samples were obtained with DB-ADVANCE X-Ray diffractometer. The electroluminescence (EL) spectra, luminous efficiency, color rendering index (CRI) and chromaticity coordinate of WLED were obtained with Keithley 2400 light meter and Photo Research 670 spectrometer. The CSs-WLED surface temperature was detected and recorded using thermal infrared imager (FOTRIC, USA).

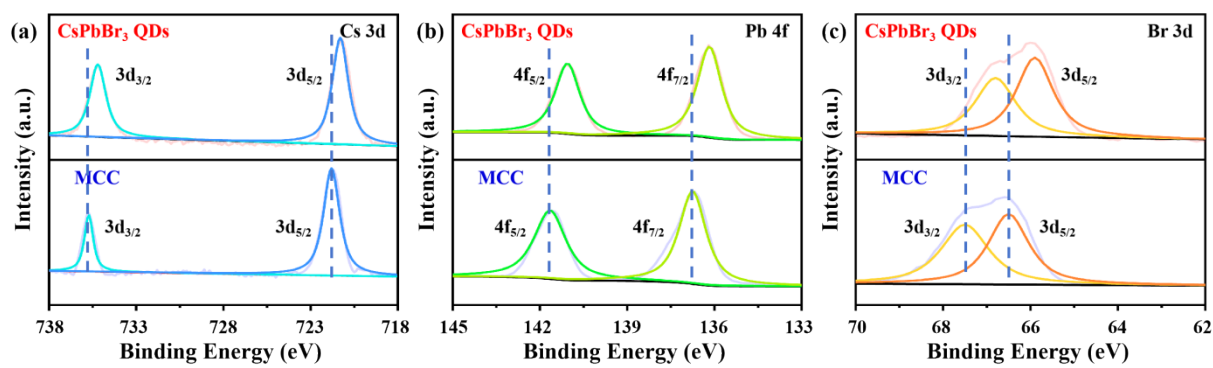

**Fig. S1** Comparison of high-resolution XPS spectra of Cs 3d, Pb 4f and Br 3d.

**Table S1.** ICP-OES results and calculations.

| Mn/Pb feeding ratio (mol/mol) | Mn <sup>2+</sup> (g) | Mn <sup>2+</sup> (mol) | Pb <sup>2+</sup> (g) | Pb <sup>2+</sup> (mol) | Mn/Pb doping ratio (mol/mol) |
|-------------------------------|----------------------|------------------------|----------------------|------------------------|------------------------------|
| 33%/67%<br>(0.5/1.0)          | 0.000007             | 1.27412E-07            | 0.000076             | 3.66795E-07            | 26%/74%                      |
| 50%/50%<br>(1.0/1.0)          | 0.000012             | 2.18420E-07            | 0.000073             | 3.52317E-07            | 38%/62%                      |
| 60%/40%<br>(1.5/1.0)          | 0.000013             | 2.36622E-07            | 0.000062             | 2.99228E-07            | 44%/56%                      |
| 67%/33%<br>(2.0/1.0)          | 0.000013             | 2.36622E-07            | 0.000057             | 2.75097E-07            | 46%/54%                      |
| 71%/29%<br>(2.5/1.0)          | 0.000019             | 3.45832E-07            | 0.000069             | 3.33012E-07            | 51%/49%                      |

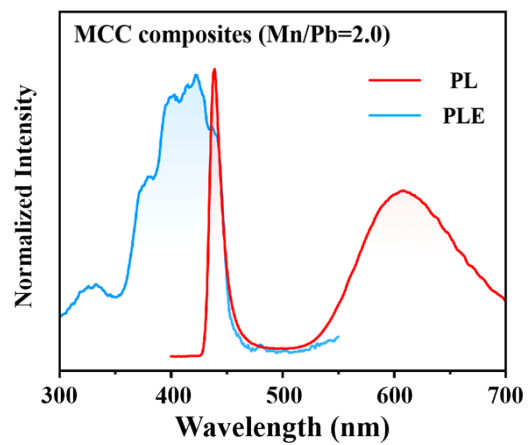

**Fig. S2** PL excitation spectra of MCC composites (Mn/Pb=2.0) for emission at 600 nm.

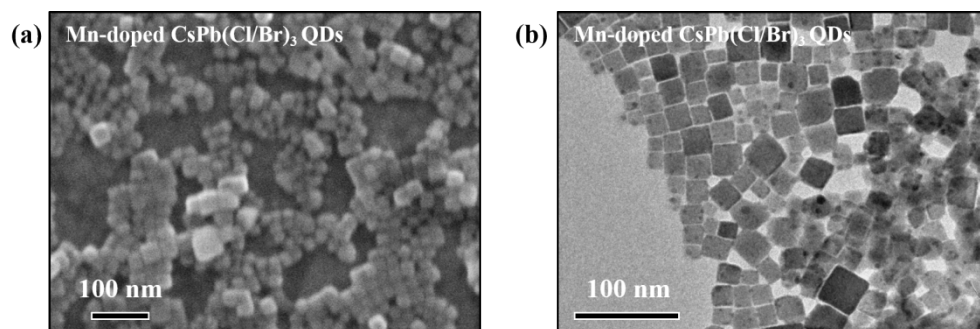

**Fig. S3** (a) SEM and (b) TEM image of Mn-doped CsPb(Cl/Br)<sub>3</sub> QDs (Mn/Pb=2.0).

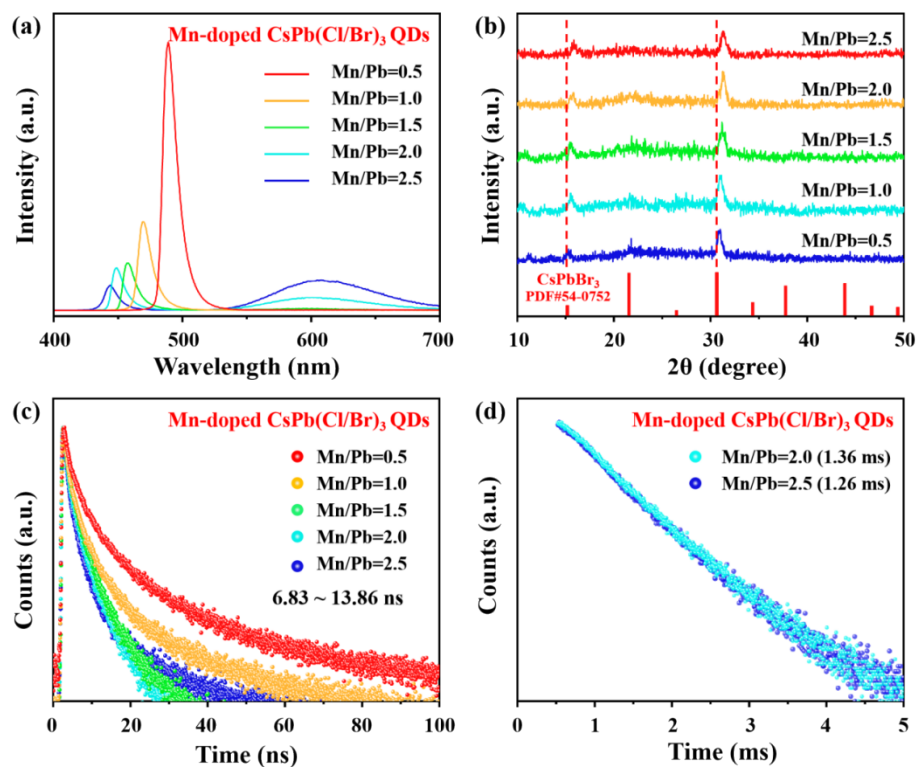

**Fig. S4** PL spectra ( $\lambda=365$  nm) and XRD patterns of CsPb(Cl/Br)<sub>3</sub> QDs with different Mn<sup>2+</sup> doping amounts. Time-resolved fluorescence spectra of (c) excitons and (d) Mn<sup>2+</sup> ions of CsPb(Cl/Br)<sub>3</sub> QDs with different Mn<sup>2+</sup> doping amounts.



**Table S2.** Comparison of fluorescence lifetimes of MCC composites and Mn-doped CsPb(Cl/Br)<sub>3</sub>

QDs.

| MCC composites                           | Mn/Pb=0.5 | Mn/Pb=1.0 | Mn/Pb=1.5 | Mn/Pb=2.0 | Mn/Pb=2.5 |
|------------------------------------------|-----------|-----------|-----------|-----------|-----------|
| $\tau_{\text{ave}}$ (exciton)            | 21.87 ns  | 17.19 ns  | 13.67 ns  | 11.91 ns  | 10.74 ns  |
| $\tau_{\text{ave}}$ (Mn <sup>2+</sup> )  | 2.13 ms   | 2.20 ms   | 2.26 ms   | 2.33 ms   | 2.30 ms   |
| Mn-doped<br>CsPb(Cl/Br) <sub>3</sub> QDs | Mn/Pb=0.5 | Mn/Pb=1.0 | Mn/Pb=1.5 | Mn/Pb=2.0 | Mn/Pb=2.5 |
| $\tau_{\text{ave}}$ (exciton)            | 13.86 ns  | 9.42 ns   | 8.34 ns   | 7.66 ns   | 6.83 ns   |
| $\tau_{\text{ave}}$ (Mn <sup>2+</sup> )  | -         | -         | -         | 1.36 ms   | 1.26 ms   |

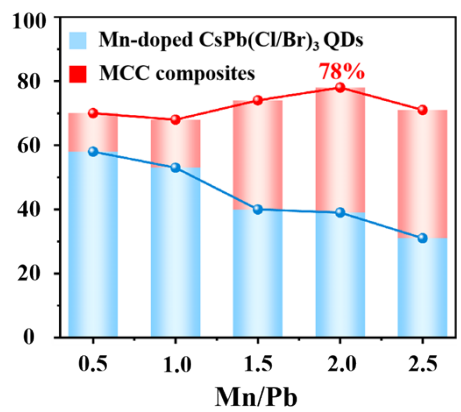

**Fig. S5** Comparison of PLQY of MCC composites with different Mn<sup>2+</sup> doping concentrations.

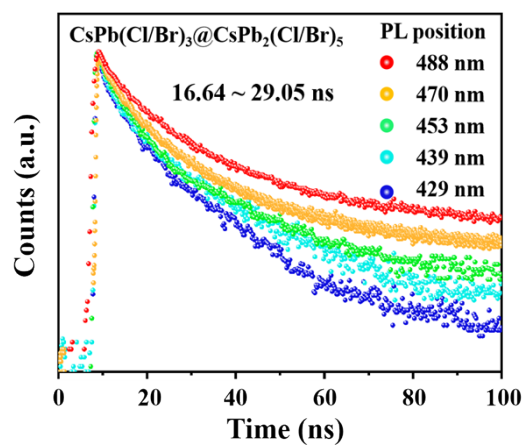

**Fig S6.** The time-resolved PL decays of CsPb(Cl/Br)<sub>3</sub>@CsPb<sub>2</sub>(Cl/Br)<sub>5</sub> composites.

**Table S3.** The exciton-to-Mn<sup>2+</sup> energy transfer efficiency ( $\eta_{ET}$ ) in MCC composites.

| PL position<br>(nm) | $\tau_0$ (ns) | $\tau_1$ (ns) | $\eta_{ET}$ |
|---------------------|---------------|---------------|-------------|
| 488                 | 29.05         | 21.87         | 24.7%       |
| 470                 | 24.22         | 17.19         | 29.0%       |
| 453                 | 21.53         | 13.67         | 36.5%       |
| 439                 | 20.55         | 11.91         | 42.0%       |
| 429                 | 16.64         | 10.74         | 35.5%       |

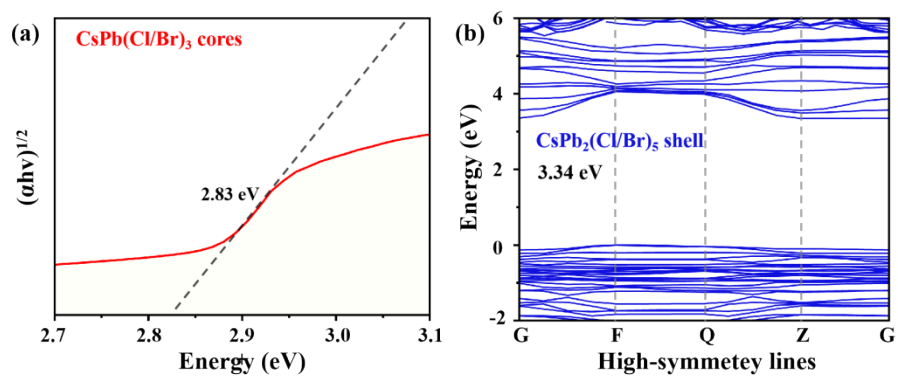

**Fig. S7** (a) Optical band gap of CsPb(Cl/Br)<sub>3</sub> cores. (b) The electronic structures of tetragonal CsPb<sub>2</sub>(Cl/Br)<sub>5</sub> shell.

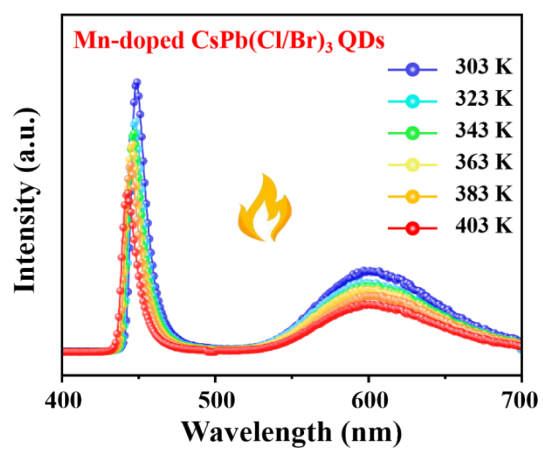

**Fig. S8** Temperature-dependent PL spectra of Mn-doped CsPb(Cl/Br)<sub>3</sub> QDs (Mn/Pb=2.0) at

303~403 K.

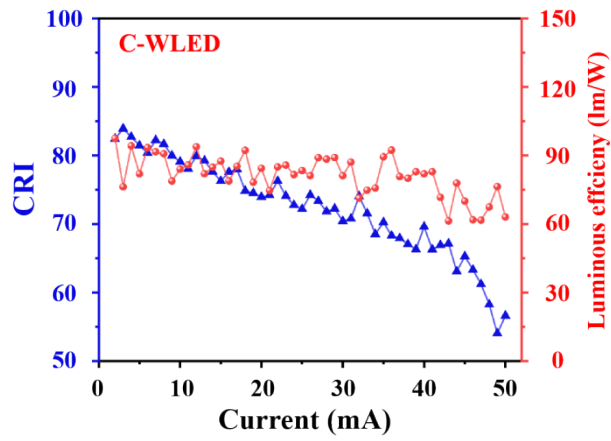

**Fig. S9** Luminous efficiency and color rendering index of C-WLEDs at 2~50 mA driving current.
